# Supplementary material for: Altered movement patterns and muscular activity during single and double leg squats in individuals with anterior cruciate ligament injury
Source: Springer Nature journal article supplement (doi:10.1186/s12891-015-0472-y), 2015-02-12

## **Additional file 1**

**Title:** Absolute amplitudes

Median and quartiles ( $Q_1$  and  $Q_3$ ) for absolute amplitudes for each time bin, each muscle, for non-injured and injured sides for the test-movements Single Leg Squat (SLS) and the Double Leg Squat (DLS) for 16 participants with ACL rupture.

**SLS Gluteus medius, non-injured**

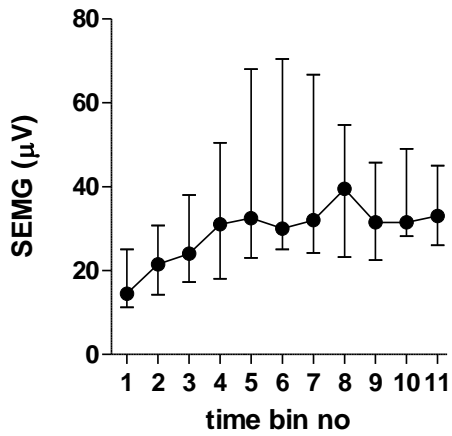

**SLS Gluteus medius, injured**

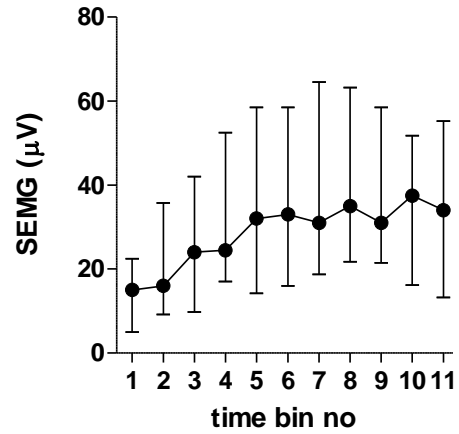

**SLS Biceps femoris, non-injured**

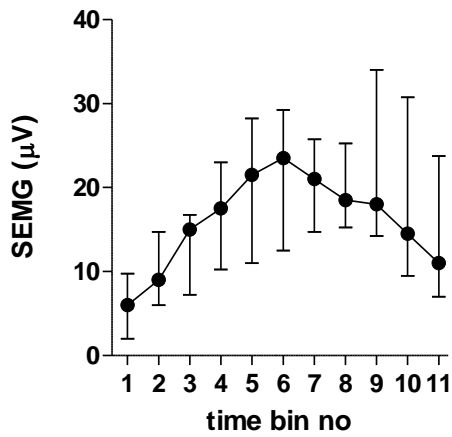

**SLS Biceps femoris, injured**

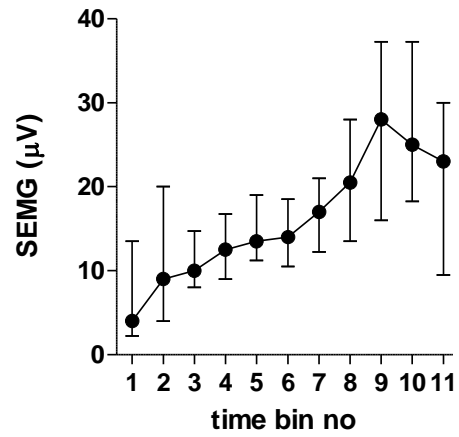

**SLS Quadriceps, non-injured**

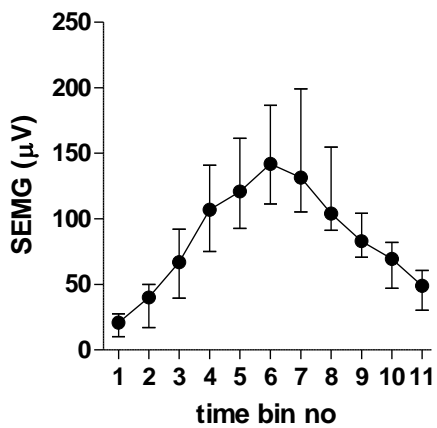

**SLS Quadriceps, injured**

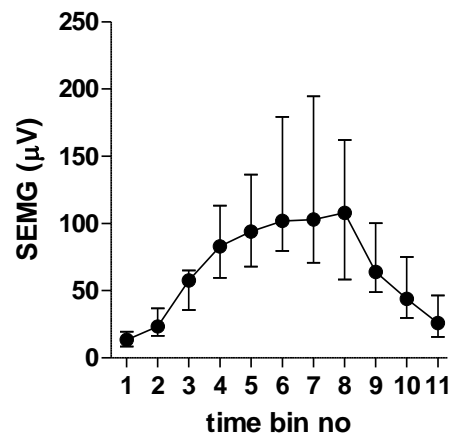

SLS Tibialis anterior, non-injured

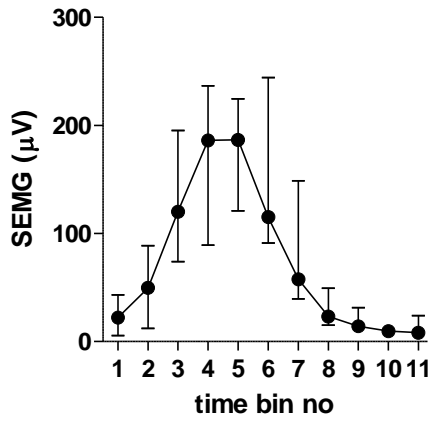

SLS Tibialis anterior, injured

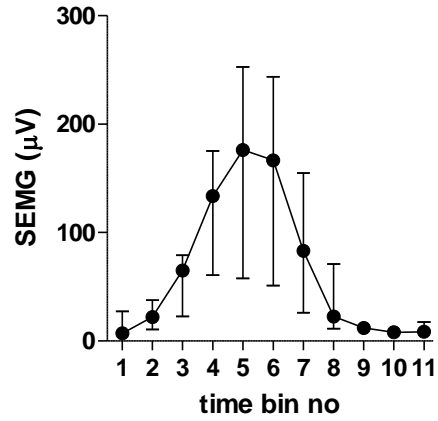

SLS Gastrocnemius m., non-injured

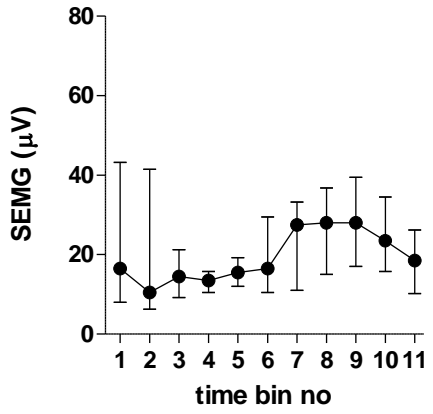

SLS Gastrocnemius m., injured

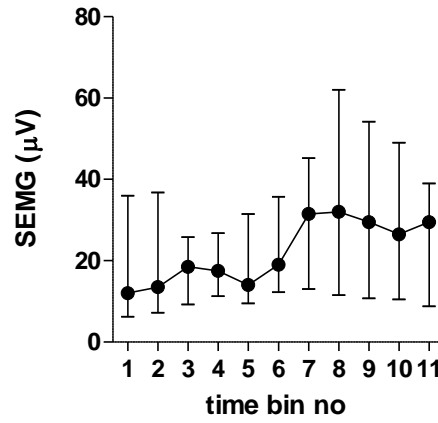

SLS Peroneus longus, non-injured

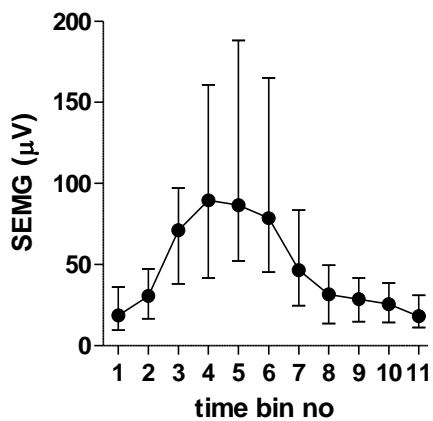

SLS Peroneus longus, injured

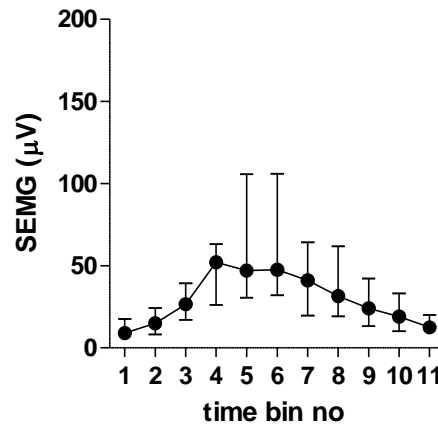

DLS Gluteus medius, non-injured

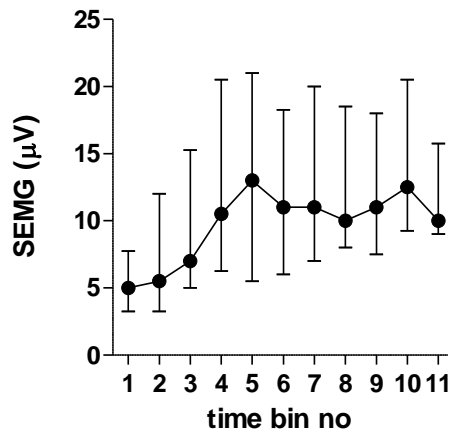

DLS Gluteus medius, injured

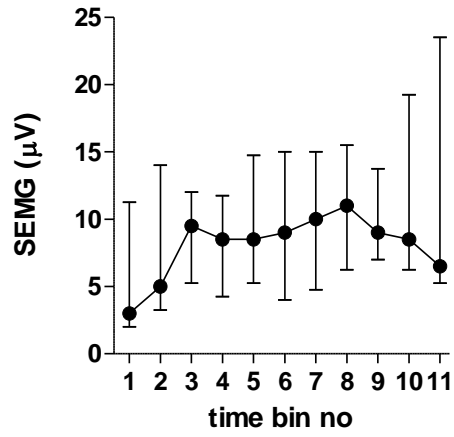

DLS Biceps femoris, non-injured

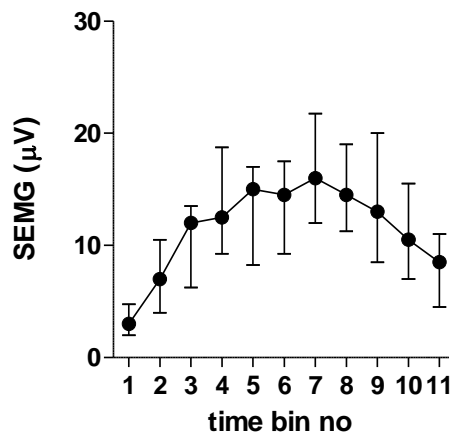

DLS Biceps femoris, injured

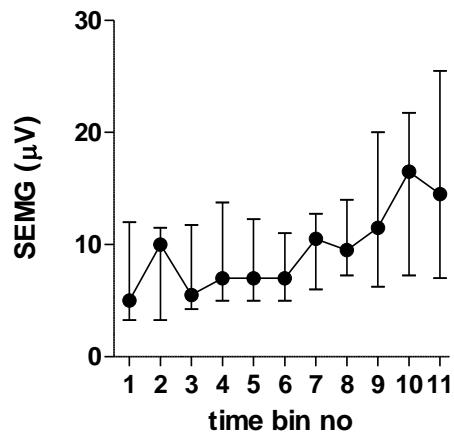

DLS Quadriceps, non-injured

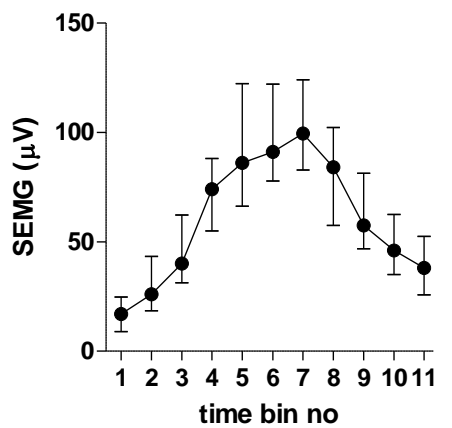

DLS Quadriceps, injured

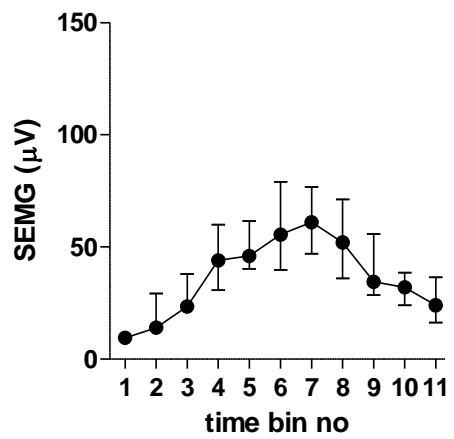

DLS Tibialis anterior, non-injured

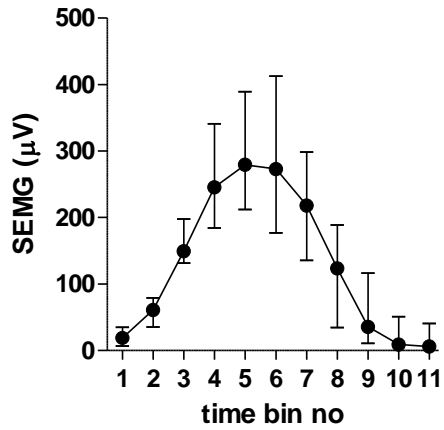

DLS Tibialis anterior, injured

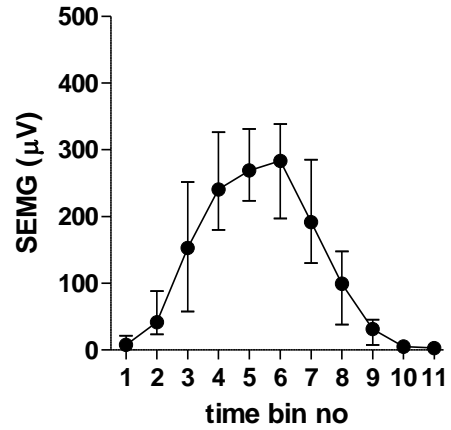

DLS Gastrocnemius m., non-injured

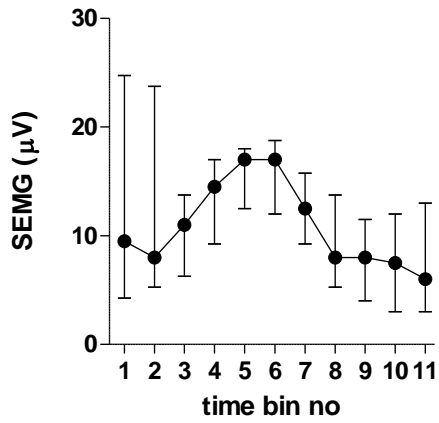

DLS Gastrocnemius m., injured

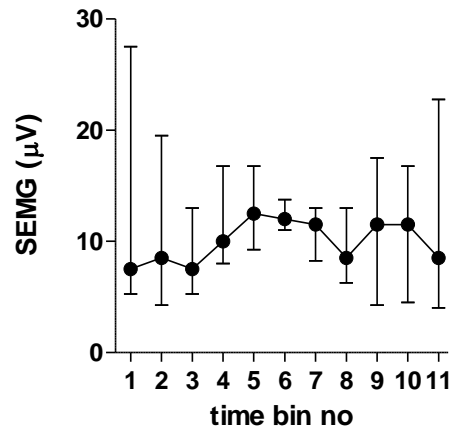

DLS Peroneus longus, non-injured

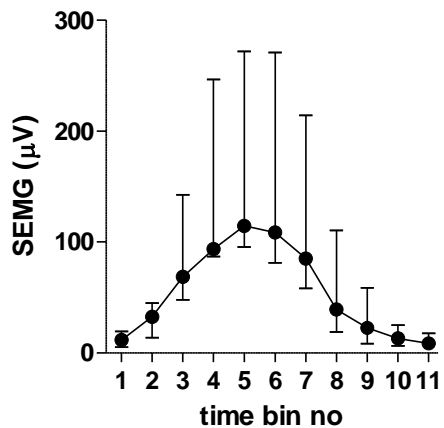

DLS Peroneus longus, injured

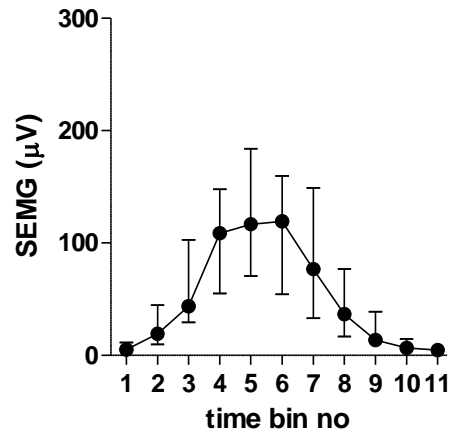

Supplement: MOESM1 [file 9752158]
